# Supplementary material
Source: bioRxiv or medRxiv preprint supplement (https://medrxiv.org/highwire/filestream/96943/field_highwire_adjunct_files/6/2019.12.23.19014407-5.pdf)

A

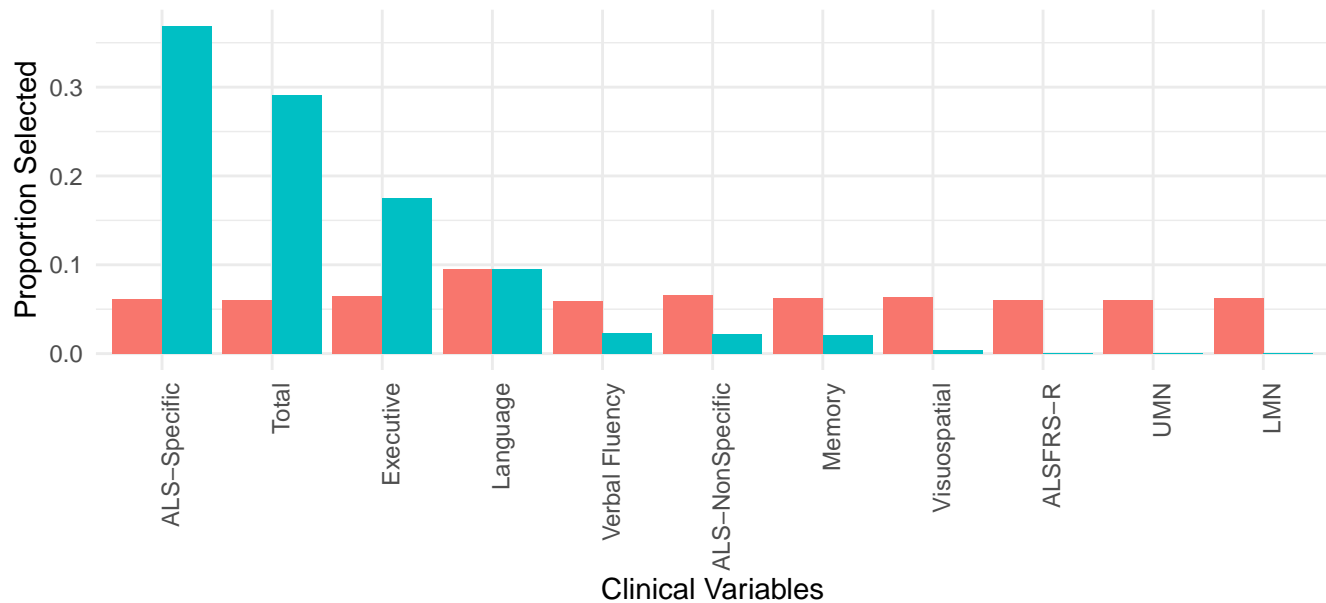

B

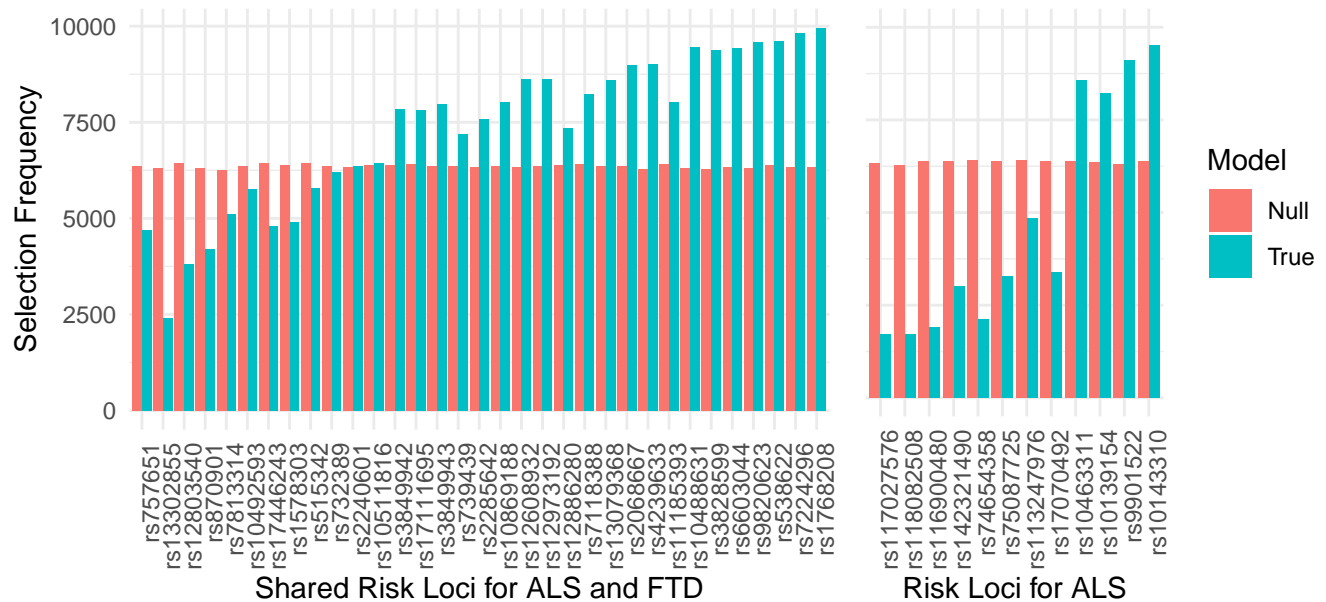

Supplement: Supplementary file [file 2019.12.23.19014407-5.pdf]
